# Supplementary material for: Development and validation of a risk prediction model for depression in community-based chronic obstructive pulmonary disease patients using machine learning techniques
Source: Research Square preprint supplement (doi:10.21203/rs.3.rs-5651501/v1), 2024-12-26
Supplement: Supplementary file 1 [file ee0dfc19a46487bb2445f165.docx]

**Table S1:Multi-model classification - Summary of training set results:**

| ML model | AUC(95%CI) | cutoff(95%CI) | Accuracy (95% CI) | Sensitivity (95% CI) | Specificity (95% CI) | PPV (95% CI) | NPV (95% CI) | F1 score (95% CI) | Kappa(95%CI) |
| --- | --- | --- | --- | --- | --- | --- | --- | --- | --- |
| XGBoost | 0.968 (0.957-0.979) | 0.537(0.512-0.562) | 0.903(0.899-0.907) | 0.897(0.882-0.913) | 0.912(0.895-0.928) | 0.936(0.925-0.947) | 0.862(0.844-0.880) | 0.916(0.912-0.919) | 0.801(0.794-0.808) |
| RandomForest | 0.991 (0.986-0.996) | 0.564(0.544-0.585) | 0.946(0.942-0.950) | 0.93(0.923-0.938) | 0.968(0.960-0.975) | 0.976(0.971-0.981) | 0.908(0.899-0.917) | 0.952(0.949-0.956) | 0.889(0.881-0.897) |
| KNN | 0.820 (0.790-0.851) | 0.66(0.600-0.720) | 0.655(0.614-0.695) | 0.454(0.368-0.541) | 0.936(0.908-0.964) | 0.924(0.891-0.957) | 0.557(0.526-0.589) | 0.592(0.511-0.674) | 0.358(0.298-0.419) |
| logistic | 0.718 (0.679-0.758) | 0.541(0.531-0.551) | 0.681(0.677-0.686) | 0.717(0.700-0.734) | 0.631(0.604-0.657) | 0.734(0.723-0.746) | 0.611(0.601-0.621) | 0.725(0.720-0.730) | 0.346(0.334-0.357) |
| LightGBM | 0.925 (0.906-0.944) | 0.563(0.536-0.590) | 0.846(0.842-0.850) | 0.828(0.804-0.851) | 0.872(0.845-0.899) | 0.903(0.886-0.920) | 0.784(0.764-0.805) | 0.863(0.857-0.868) | 0.688(0.682-0.694) |
| MLP | 0.560 (0.516-0.604) | 0.586(0.559-0.612) | 0.545(0.520-0.569) | 0.477(0.352-0.602) | 0.64(0.521-0.759) | 0.683(0.636-0.730) | 0.468(0.455-0.480) | 0.524(0.425-0.623) | 0.111(0.099-0.124) |

**Table S2:Multi-model classification-validation set result summary:**

| ML model | AUC(95%CI) | cutoff(95%CI) | Accuracy (95% CI) | Sensitivity (95% CI) | Specificity (95% CI) | PPV (95% CI) | NPV (95% CI) | F1 score (95% CI) | Kappa(95%CI) |
| --- | --- | --- | --- | --- | --- | --- | --- | --- | --- |
| XGBoost | 0.661 (0.577-0.744) | 0.537(0.512-0.562) | 0.628(0.606-0.650) | 0.662(0.616-0.707) | 0.578(0.533-0.623) | 0.685(0.655-0.715) | 0.554(0.523-0.585) | 0.671(0.639-0.703) | 0.237(0.196-0.279) |
| RandomForest | 0.654 (0.568-0.739) | 0.564(0.544-0.585) | 0.627(0.608-0.647) | 0.644(0.607-0.681) | 0.604(0.573-0.635) | 0.707(0.688-0.726) | 0.536(0.504-0.568) | 0.672(0.650-0.694) | 0.243(0.207-0.278) |
| KNN | 0.627 (0.542-0.712) | 0.66(0.600-0.720) | 0.543(0.518-0.567) | 0.353(0.286-0.419) | 0.828(0.777-0.880) | 0.774(0.716-0.832) | 0.458(0.439-0.476) | 0.473(0.407-0.538) | 0.159(0.120-0.198) |
| logistic | 0.717 (0.637-0.797) | 0.541(0.531-0.551) | 0.67(0.637-0.702) | 0.695(0.640-0.750) | 0.635(0.610-0.659) | 0.729(0.698-0.760) | 0.598(0.554-0.642) | 0.71(0.670-0.749) | 0.326(0.268-0.384) |
| LightGBM | 0.664 (0.580-0.748) | 0.563(0.536-0.590) | 0.627(0.606-0.647) | 0.635(0.594-0.675) | 0.612(0.556-0.667) | 0.708(0.684-0.732) | 0.534(0.508-0.560) | 0.667(0.642-0.693) | 0.24(0.197-0.284) |
| MLP | 0.535 (0.445-0.624) | 0.586(0.559-0.612) | 0.498(0.479-0.517) | 0.444(0.332-0.556) | 0.579(0.440-0.718) | 0.628(0.572-0.684) | 0.42(0.395-0.445) | 0.485(0.402-0.569) | 0.019(-0.023-0.061) |
